# Supplementary material for: Cancer risk and tumour spectrum in 172 patients with a germline SUFU pathogenic variation: a collaborative study of the SIOPE Host Genome Working Group
Source: HighWire-hosted journal article supplement (doi:10.1136/jmedgenet-2021-108385), 2022-06-29
Supplement: jmedgenet-2021-108385supp002_data_supplement.pdf [file jmedgenet-2021-108385supp002_data_supplement.pdf]

# Figure S2

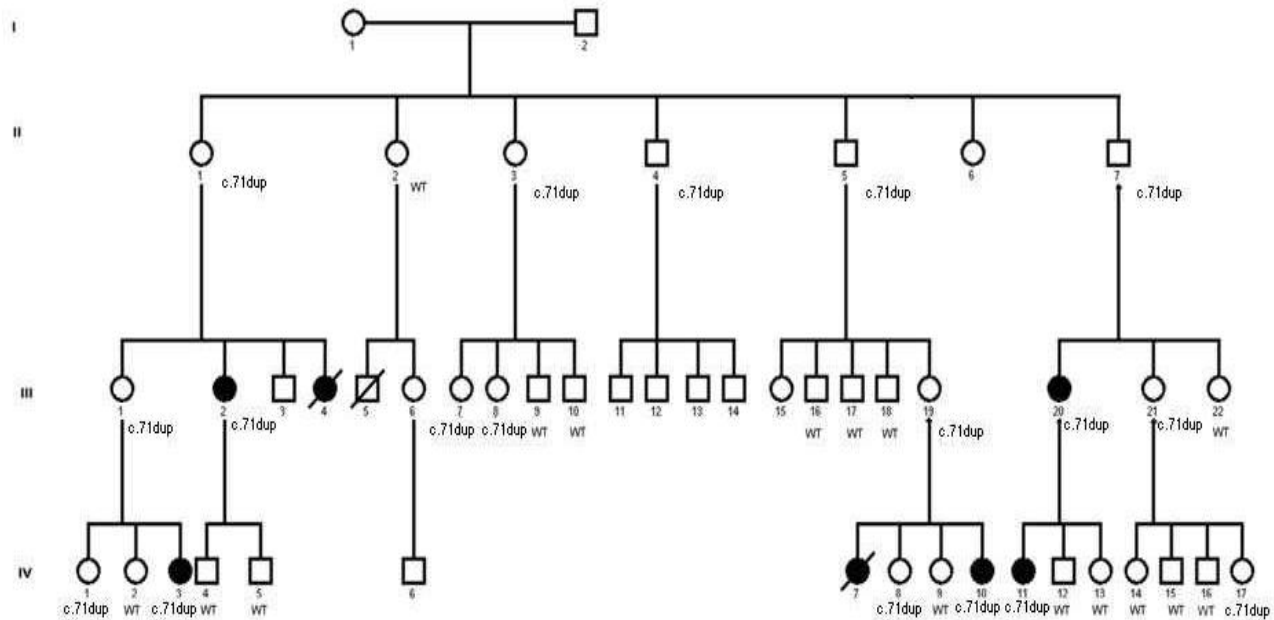

**Figure S2.** Genealogical table of one family with an history of 5 children (III-2, III-20, IV-3, IV-10 and IV-11) with a documented germline *SUFU* PV affected with a proven medulloblastoma (Family 3)

Legend: Girls affected with medulloblastoma (probable or proven) are shown with filled circles.
