# Supplementary material for: Cancer risk and tumour spectrum in 172 patients with a germline SUFU pathogenic variation: a collaborative study of the SIOPE Host Genome Working Group
Source: HighWire-hosted journal article supplement (doi:10.1136/jmedgenet-2021-108385), 2022-06-29
Supplement: jmedgenet-2021-108385supp005_data_supplement.pdf [file jmedgenet-2021-108385supp005_data_supplement.pdf]

# Table S2

**Table S2.** Description of the various *SUFU* PVs identified in the cohort (NM\_016169.4)

| publication                                                | mutation c           | mutation p         | Mutation type        | Recurrence in n families |
|------------------------------------------------------------|----------------------|--------------------|----------------------|--------------------------|
| (9,24,31, 34) (5 families) and present report (2 families) | c.1022+1G>A          | p.?                | Splicing             | 7 families               |
| (31,35) (2 families) and present report (3 families)       | c.71dup              | p.(Ala25Glyfs*23)  | Frameshift           | 5 families               |
| (20,31) (3 families)                                       | c.71del              | p.(Pro24Argfs*72)  | Frameshift           | 3 families               |
| (14,29) and present report                                 | c.1-? 1455+?del      | del exon 1-12      | Structural variation | 3 families               |
| (8,19, 31)                                                 | c.318-? 1455+?del    | del exon 3-12      | Structural variation | 2 families               |
| (8,19,26)                                                  | c.550C>T             | p.(Gln184*)        | Nonsense             | 2 families               |
| (20) and present report                                    | c.436C>T             | p.(Arg146*)        | Nonsense             | 2 families               |
| (20) and present report                                    | c.455-1G>A           | p.?                | Splicing             | 2 families               |
| (20) and present report                                    | c.895C>T             | p.(Arg299*)        | Nonsense             | 2 families               |
| (8,19)                                                     | c.544G>T             | p.(Asp182Tyr)      | Missense             | 1 family                 |
| (20)                                                       | c.1077del            | p.(Glu359Aspfs*2)  | Frameshift           | 1 family                 |
| (20)                                                       | c.37_53del           | p.(Thr13Trpfs*29)  | Frameshift           | 1 family                 |
| (20)                                                       | c.37_53dup           | p.(Gly19Profs*83)  | Frameshift           | 1 family                 |
| (20)                                                       | c.642G>A             | p.(Trp214*)        | Nonsense             | 1 family                 |
| (20)                                                       | c.684-2A>G           | p.?                | Splicing             | 1 family                 |
| (20)                                                       | c.749dup             | p.(His250Glnfs*7)  | Frameshift           | 1 family                 |
| (20)                                                       | c.925del             | p.(Arg309Glyfs*4)  | Frameshift           | 1 family                 |
| (14,23)                                                    | c.143dup             | p.(Pro49Alafs*24)  | Frameshift           | 1 family                 |
| (14,23)                                                    | c.183-1G>T           | p.?                | Splicing             | 1 family                 |
| (24)                                                       | c.846dup             | p.(Glu283Argfs*3)  | Frameshift           | 1 family                 |
| (27)                                                       | c.367C>T             | p.(Arg123Cys)      | Missense             | 1 family                 |
| (28)                                                       | c.756+1G>A           | p.?                | Splicing             | 1 family                 |
| (30)                                                       | c.757-2A>G           | p.?                | Splicing             | 1 family                 |
| (31)                                                       | c.1023-? 1455+?del   | del exon 9-12      | Structural variation | 1 family                 |
| (31)                                                       | c.1096_1117delinsGAA | p.(Leu366Glufs*14) | Frameshift           | 1 family                 |
| (31)                                                       | c.1123C>T            | p.(Gln375*)        | Nonsense             | 1 family                 |
| (31)                                                       | c.1149_1150dup       | p.(Cys384Serfs*3)  | Frameshift           | 1 family                 |
| (31)                                                       | c.1297-1G>C          | p.?                | Splicing             | 1 family                 |
| (31)                                                       | c.182+3A>T           | p.?                | Splicing             | 1 family                 |
| (31)                                                       | c.294_295dup         | p.(Tyr99Serfs*23)  | Frameshift           | 1 family                 |
| (31)                                                       | c.318-? 454+?dup     | dup exon 3         | Structural variation | 1 family                 |
| (31)                                                       | c.318-10del          | p.?                | Splicing             | 1 family                 |
| (31)                                                       | c.422T>G             | p.(Met141Arg)      | Missense             | 1 family                 |
| (31)                                                       | c.567_571delinsT     | p.(Gln189Hisfs*5)  | Frameshift           | 1 family                 |
| (32)                                                       | c.954del             | p.(Asn319Thrfs*42) | Frameshift           | 1 family                 |
| (33)                                                       | c.223del             | p.(Arg75Glyfs*21)  | Frameshift           | 1 family                 |
| (34)                                                       | c.1023-1G>A          | p.?                | Splicing             | 1 family                 |
| (34)                                                       | c.171dup             | p.(Val58Argfs*15)  | Frameshift           | 1 family                 |
| (34)                                                       | c.528_529insT        | p.(Met177Tyrfs*30) | Frameshift           | 1 family                 |
| (34)                                                       | c.684-9_687del       | p.?                | Splicing             | 1 family                 |
| (34)                                                       | c.916G>T             | p.(Glu306*)        | Nonsense             | 1 family                 |
| (36)                                                       | c.1272del            | p.(Tyr424*)        | Nonsense             | 1 family                 |
| (38)                                                       | c.1365+2T>A          | p.Ile433_Glu455del | Splicing             | 1 family                 |
| (39)                                                       | c.597+1dupG          | p.?                | Splicing             | 1 family                 |
| Present report                                             | c.1022+1G>T          | p.?                | Splicing             | 1 family                 |
| Present report                                             | c.1158-2A>G          | p.?                | Splicing             | 1 family                 |
| Present report                                             | c.1236_1237del       | p.(Val413Glyfs*7)  | Frameshift           | 1 family                 |
| Present report                                             | c.1297-? 1455+?del   | del exon 11-12     | Structural variation | 1 family                 |
| Present report                                             | c.1366-? 1455+?del   | del exon 12        | Structural variation | 1 family                 |
| Present report                                             | c.1390T>C            | p.(Trp464Arg)      | Missense             | 1 family                 |
| Present report                                             | c.17del              | p.(Pro6fs*89)      | Frameshift           | 1 family                 |
| Present report                                             | c.182+1G>C           | p.?                | Splicing             | 1 family                 |
| Present report                                             | c.183G>A             | p.(Trp61*)         | Nonsense             | 1 family                 |
| Present report                                             | c.201del             | p.(Leu68Trpfs*28)  | Frameshift           | 1 family                 |
| Present report                                             | c.293T>G             | p.(Leu98Arg)       | Missense             | 1 family                 |
| Present report                                             | c.326del             | p.(Gly109Glufs*12) | Frameshift           | 1 family                 |
| Present report                                             | c.455-? 1455+?del    | del exon 4-12      | Structural variation | 1 family                 |
| Present report                                             | c.582dup             | p.(Val195Serfs*12) | Frameshift           | 1 family                 |
| Present report                                             | c.597+1G>A           | p.?                | Splicing             | 1 family                 |
| Present report                                             | c.756+2dup           | p.?                | Splicing             | 1 family                 |
| Present report                                             | c.756+2T>C           | p.?                | Splicing             | 1 family                 |
| Present report                                             | c.846del             | p.(Glu283Argfs*30) | Frameshift           | 1 family                 |
| Present report                                             | c.856G>T             | p.(Glu286*)        | Nonsense             | 1 family                 |
| Present report                                             | c.917_918del         | p.(Glu306Alafs*44) | Frameshift           | 1 family                 |
